1 RUNNING TITLE: Spatiotemporal hyporheic assembly and physiology

2

3 Deterministic assembly processes govern seasonal and spatial variation in microbiomes across  
4 hydrologically-connected hyporheic zones

5

6 Emily B. Graham,<sup>1\*</sup> Alex R. Crump,<sup>1</sup> Charles T. Resch,<sup>2</sup> Sarah Fansler,<sup>1</sup> Evan Arntzen,<sup>3</sup> David  
7 W. Kennedy,<sup>1</sup> Jim K. Fredrickson,<sup>1</sup> James C. Stegen<sup>1</sup>

8 <sup>1</sup>Biological Sciences Division, Pacific Northwest National Laboratory, Richland, WA USA

9 <sup>2</sup>Geochemistry Department, Pacific Northwest National Laboratory, Richland, WA USA

10 <sup>3</sup>Environmental Compliance and Emergency Preparation, Pacific Northwest National  
11 Laboratory, Richland, WA USA

12

13 \***Corresponding author:** Emily B. Graham, Pacific Northwest National Laboratory, PO Box  
14 999, Richland, WA 99352, 509-372-6049, emily.graham@pnnl.gov

15

16 *Data accessibility statement:* Upon acceptance for publication, all data will be made publically  
17 available, and the DOI will be provided in-text.

18

19 *Conflict of Interest:* The authors declare no conflict of interest.

20

21

22 **Originality-Significance Statement.** Subsurface zones of groundwater and surface water  
23 mixing (hyporheic zones) are hotspots of biogeochemical activity and strongly influence carbon,  
24 nutrient and contaminant dynamics within riverine ecosystems. Hyporheic zone microbiomes are  
25 responsible for up to 95% of riverine ecosystem respiration, yet the ecology of these  
26 microbiomes remains poorly understood. While significant progress is being made in the  
27 development of microbially-explicit ecosystem models, poor understanding of hyporheic zone  
28 microbial ecology impedes development of such models in this critical zone. To fill the  
29 knowledge gap, we present a comprehensive analysis of hyporheic zone microbiomes through  
30 space and time. We quantify ecological drivers of microbiome change and identify taxa that may  
31 be particularly important to hyporheic zone biogeochemical function. Despite pronounced  
32 hydrologic connectivity throughout the hyporheic zone, we find that ecological selection  
33 deterministically governs microbiome composition within local environments and that  
34 comparatively high-organic C conditions during surface water intrusion into the hyporheic zone  
35 may support heterotrophic metabolisms, succumbing to autotrophy during time periods of  
36 groundwater discharge. These results provide new opportunities to develop microbially-explicit  
37 ecosystem models that incorporate the hyporheic zone and its influence over riverine ecosystem  
38 function.

39

40 **Keywords:** selection, dispersal, subsurface, microbial community structure, community

41 assembly, freshwater biology, microbial ecology, stochastic assembly

42

43 **Summary.**

44           Subsurface zones of groundwater and surface water mixing (hyporheic zones) are regions  
45 of enhanced rates of biogeochemical cycling, but ecological processes influencing hyporheic  
46 microbiomes through space and time remain unknown. We sampled attached and planktonic  
47 microbiomes in the Columbia River hyporheic zone across seasonal hydrologic change within  
48 three hydrologically-connected, yet physicochemically-distinct geographic zones (inland,  
49 nearshore, river). Although microbiomes remained dissimilar through time across all zones and  
50 habitat types (attached vs. planktonic), consistent presence of certain heterotrophic taxa  
51 suggested dispersal and/or common selective pressures among all zones. We used statistical null  
52 models and co-occurrence network analysis, respectively, to demonstrate a pronounced impact of  
53 deterministic assembly on microbiomes in all data subsets and to elucidate taxa most affected by  
54 these processes. The composition of one network cluster of nearshore organisms exhibited a  
55 seasonal shift from heterotrophic to autotrophic microorganisms, and the abundance of taxa  
56 within this cluster also correlated positively with active microbial biomass and metabolism,  
57 possibly indicating that these taxa have strong influences over biogeochemical reactions within  
58 the hyporheic zone. Taken together, our research demonstrates a predominant role for  
59 deterministic assembly across highly-connected environments and provides insight into niche  
60 dynamics associated with seasonal changes in hyporheic microbiome composition and  
61 metabolism.

62 **Introduction.**

63 Environmental transition zones exhibit elevated rates of biogeochemical cycling  
64 compared to other systems and experience extreme variation in physicochemical characteristics  
65 (Hedin et al., 1998; McClain et al., 2003). In particular, groundwater-surface water mixing  
66 (hyporheic) zones are characterized by temporally and spatially dynamic, redox-active  
67 environments associated with changes in river stage (Hancock et al., 2005; Boulton et al., 2010).  
68 Hyporheic zones regulate watershed-scale biogeochemistry by transporting and modifying  
69 carbon and nutrients between rivers and their catchments (Boano et al., 2014; Battin et al., 2016).  
70 Yet, sediment microbiomes mediating hyporheic biogeochemical cycling have rarely been  
71 examined (Robertson and Wood, 2010; Marmonier et al., 2012; Gonzalez and Bell, 2013). As  
72 such, microbial biogeography as well as ecological processes that impact microbiome  
73 composition and function throughout hyporheic zones constitute key knowledge gaps in  
74 understanding these important transition zones.

75 Interactions between hydrologic transport, local abiotic conditions, and biotic processes  
76 result in diverse hyporheic microbiomes and are essential to understanding major  
77 biogeochemical cycles (Boulton et al., 2010; Battin et al., 2016; Stegen et al., 2016). In  
78 particular, microbial community assembly processes are thought to be imperative in coupling  
79 microbiomes with ecosystem functioning across a range of environments (Ferrenberg et al.,  
80 2013; Nemergut et al., 2013; Graham et al., 2016a; Graham et al., 2016b). Determinism (*e.g.*,  
81 selection) may either sort species such that the microbiome is optimized for a given environment  
82 or exclude biodiversity that supports ecosystem functioning (Knelman and Nemergut, 2014;  
83 Graham et al., 2016a), while stochasticity (*e.g.*, dispersal, drift) can regulate microbial  
84 community membership via mechanisms such as priority effects (Fukami, 2004; Fukami et al.,

85 2010) and dispersal limitation (Lindström and Langenheder, 2012; Adams et al., 2013; Cline and  
86 Zak, 2014). In sediments, assembly processes may be particularly important for biogeochemical  
87 function because abiotic conditions and hydrologic flow vary over short (<1 mm) distances,  
88 generating diverse niches with distinct environmental filters as well as providing dispersal routes  
89 for microorganisms (Battin et al., 2016).

90 Selection has been widely shown to impact environmental microbiomes (Fierer and  
91 Jackson, 2006; Lauber et al., 2009), while stochastic processes can influence microbial  
92 community composition when environmental heterogeneity and/or species sorting is weak  
93 (Stegen et al., 2012; Wang et al., 2013; Woodcock et al., 2013; Battin et al., 2016). Both of these  
94 processes operate in concert to structure microbiomes, and recent work has focused on  
95 deciphering the balance of deterministic vs. stochastic assembly processes through space and  
96 time (Ferrenberg et al., 2013; Dini-Andreote et al., 2015; Graham et al., 2016a). Further,  
97 assembly processes function at an organismal level; determinism selects for traits contained  
98 within certain groups of organisms and dispersal disproportionately affects organisms expressing  
99 traits for motility (Martiny et al., 2006; Martiny et al., 2013). Understanding microbiome  
100 assembly at the sub-community level is therefore paramount in fully comprehending microbiome  
101 assembly and subsequent ecosystem functioning. Yet, influences of assembly processes on  
102 specific groups of microorganisms are poorly understood, and linking a process-based  
103 understanding of variation in microbiome composition to the metabolism of carbon and nutrients  
104 remains a vital unknown in ecosystem science, particularly within environmental transition zones  
105 that harbor a variety of complementary resources (Boulton et al., 2010; Stegen et al., 2016).

106 The Hanford Reach of the Columbia River constitutes a hyporheic zone with an extensive  
107 floodplain aquifer, presenting a prime opportunity for investigating spatiotemporal linkages

108 between community assembly processes and environmental microbiomes. We sampled  
109 geographically distinct but hydrologically-connected zones that lie in close proximity (<250m) –  
110 near the inland groundwater aquifer, in the nearshore subsurface environment, and in the  
111 Columbia River surface water – across a 9-month time period. Previous research has shown  
112 redox conditions as well as microbiomes to be variable across space and time in this system (Lin  
113 et al., 2012a; Lin et al., 2012b; Stegen et al., 2012; Graham et al., 2016a). Here, we use  
114 ecological modeling to infer assembly processes governing microbiome composition in  
115 planktonic and attached communities through time in these zones. Additionally, we use co-  
116 occurrence networks to infer relationships between deterministic assembly and specific groups of  
117 organisms; and we identify keystone taxa associated with seasonal changes in groundwater-  
118 surface water mixing. We also reveal relationships between the abundance of one cluster of  
119 nearshore organisms and changes in both active biomass and aerobic respiration, possibly  
120 denoting a central role for these organisms in hyporheic biogeochemical cycling. Together, our  
121 research furthers an understanding of spatiotemporal changes in hyporheic microbiomes and  
122 generates a conceptual model regarding the role of deterministic assembly in influencing shifts  
123 from heterotrophic to autotrophic organisms in hyporheic environments.

124

## 125 **Results.**

### 126 *Hydrology and Physicochemical Conditions.*

127 We observed variation in temporal dynamics of hydrologic mixing and physicochemistry  
128 among geographic zones (Fig. 1A-C, Table S1, Fig. S1). Increases in Cl<sup>-</sup> concentration in  
129 nearshore and inland zones at and beyond our July 22 sampling event indicated discharge of  
130 groundwater through the hyporheic zone (Fig. 1A), coincident with decreases in NPOC

131 concentration in all three zones (Fig. 1B). Temperature followed a seasonal trend in nearshore  
132 and river zones but remained stable in the inland zone (Fig. 1C).

133

134 *Microbiome composition.*

135 River planktonic (PERMANOVA,  $R^2 = 0.22$ ,  $P = 0.001$ ), nearshore attached  
136 (PERMANOVA,  $R^2 = 0.44$ ,  $P = 0.001$ ), nearshore planktonic (PERMANOVA,  $R^2 = 0.44$ ,  $P =$   
137  $0.001$ ), and inland planktonic (PERMANOVA,  $R^2 = 0.41$ ,  $P = 0.001$ ) microbiomes changed  
138 seasonally. Inland attached microbiomes (PERMANOVA,  $P = 0.29$ ) were stable through time.  
139 Comparing all 5 data subsets to each other revealed distinct microbiomes (PERMANOVA  $R^2 =$   
140  $0.25$ ,  $P = 0.001$ , Fig. S3), and within each zone the composition of planktonic and attached  
141 communities differed (PERMANOVA, nearshore  $R^2 = 0.19$ ,  $P = 0.001$ , inland  $R^2 = 0.14$ ,  $P =$   
142  $0.001$ ).

143 The ten most abundant phyla and classes in each data subset are presented in Table 1.  
144 Members of *Proteobacteria* were ubiquitous, and *Bacteroidetes* was highly abundant in all river  
145 and nearshore subsets but had lower abundance in inland zone habitats. The *Planctomycetes-*  
146 *Verrucomicrobia-Chlamydiae* (PVC) superphylum was prevalent, though the composition of  
147 organisms within this phylum varied among data subsets. *Chloracidobacteria* was widespread in  
148 attached microbiomes in both nearshore and inland zones but was not highly abundant in  
149 planktonic microbiomes. In the inland zone, classes *PBS-25* and *koll11* of the *OP3* candidate  
150 phylum were among the ten most abundant classes. Further, at the class level, the ammonia-  
151 oxidizing *Thaumarchaeota* was highly abundant in both inland planktonic and attached  
152 microbiomes, joined by a nitrite-oxidizer (*Nitrospira*) in attached microbiomes.

153

154 *Microbiome assembly.*

155 Deterministic assembly processes had more influence on microbiome composition than  
156 stochastic processes (Table 2). In attached microbiomes, both nearshore and inland, homogenous  
157 selection accounted for 82-100% of assembly processes, and in river microbiomes, homogenous  
158 selection account for >95% of assembly. While planktonic microbiomes in nearshore and inland  
159 zones exhibited higher stochasticity than their attached counterparts, selection still accounted for  
160 59.8% and 35.7% of assembly, respectively.

161 Because we hypothesized dispersal mechanisms to have the greatest impact on planktonic  
162 microbiomes compared across geographic zones, we investigated assembly processes influencing  
163 across-zone comparisons within planktonic microbiomes only. Selection comprised 57-92% of  
164 across-zone assembly processes, with dispersal being of secondary importance. Variable  
165 selection was responsible for >90% of dissimilarity in microbiomes between nearshore and  
166 inland zones, while nearshore-to-river comparisons showed an even balance of variable  
167 (34.84%) and homogenous (29.18%) selection. The influence of spatial processes was most  
168 evident in dispersal limitation (26.76%) in inland-to-river comparisons and in homogenizing  
169 dispersal (15.30%) in nearshore-to-river comparisons.

170

171 *Spatiotemporal co-occurrence networks, environmental correlations, and keystone taxa.*

172 Properties of full networks at the family level are listed in Table S3, and the composition  
173 of clusters are listed in Table S4. In the nearshore zone, attached cluster 1 was negatively  
174 correlated with time, Cl-, and temperature (Fig. 2A-D); and planktonic cluster 9 was positively  
175 correlated with time, Cl-, and temperature and negatively correlated with NPOC (Fig. 2E-H). In  
176 the inland zone, clusters of attached organisms did not display consistent trends with time or



177 physicochemistry. Cluster 3 (Fig. 2I-L) and cluster 5 (Fig. 2M-P) of inland plankton exhibited  
178 contrasting relationships with time (positive/negative),  $Cl^-$  (positive/negative), NPOC  
179 (negative/positive), and temperature (positive/negative). River planktonic cluster 2 was  
180 negatively correlated with day of year and positively correlated with  $Cl^-$ , with no evident  
181 relationships to NPOC or temperature (Fig. 2Q-T). Only one cluster – nearshore attached cluster  
182 1 – exhibited correlations with ATP and Raz (Fig. 3).

183         Nearshore attached cluster 1 contained keystone families belonging to *Verrucomicrobia*  
184 and *Thaumarchaeota*, as well as families of *Gammaproteobacteria*, *Alphaproteobacteria*, and  
185 *Chloracidobacteria* with a secondary importance (Fig. 4A, Table S4). Nearshore planktonic  
186 cluster 9 contained two keystone families—one family of unassigned organisms and one  
187 belonging to the candidate phylum *OP3* (Fig. 4B). No keystone taxa were identified in inland  
188 planktonic cluster 5 (Fig. 4C), but inland planktonic cluster 3 contained two keystone families  
189 belonging to *Chloracidobacteria* and *Chloroflexi* as well as organisms with secondary  
190 importance (Fig. 4D). No keystone taxa were identified in river cluster 2 (Fig. 4E).

191

## 192 **Discussion.**

193         Our research elucidates seasonal changes in the hyporheic zone associated with shifts in  
194 groundwater-surface mixing conditions and physicochemistry. We observed a major influence of  
195 deterministic assembly processes both within and across geographic zones, indicating selection  
196 rather than dispersal as a primary driver of microbiome composition. Below we also detail  
197 phylogeny-inferred microbial physiologies in each zone and habitat type. We further identify  
198 clusters of organisms, and keystone taxa therein, that are most effected by deterministic  
199 assembly processes, and we propose one cluster of organisms as foundational to metabolism in

200 the nearshore hyporheic environment. Finally, we present a conceptual model describing  
201 assembly processes and shifts in metabolism within hyporheic environments.

202

203 *Hydrologic and physicochemical dynamics.*

204 We observed a gradual decline in water stage beginning in June and continuing through  
205 mid-September (Fig. S1). This seasonal hydrologic change drove shifts in groundwater-surface  
206 water mixing and associated physicochemistry across all geographic zones (Fig. 1).

207 Hydrodynamics can be a driver for both stochastic and deterministic assembly processes, as  
208 advection can physically transport microorganisms across geographic barriers as well as generate  
209 changes in physicochemical selective environments. These potential influences are parsed and  
210 discussed in the following sub-sections.

211

212 *Microbiome biogeography and physiology.*

213 Biogeographical patterns in microbiomes suggest localized processes as key structuring  
214 forces in our system. While dispersal potential within hyporheic zones remains unclear  
215 (Bärlocher et al., 2006; Cornut et al., 2014), microbiomes were distinct across geographic zones  
216 in our system and physical filtering of particulates as well as steep physicochemical gradients  
217 may inhibit microbial dispersal across zones (Brunke, 1999; Hartwig and Borchardt, 2014).

218 Additionally, planktonic and attached microbiomes were distinct from each other despite  
219 physical co-location, supporting little overlap between porewater and sediment microbiomes in  
220 hyporheic zones (Febria et al., 2012) and suggesting substrate mineralogy and/or traits for  
221 attachment as selective filters (Carson et al., 2007; Jorgensen et al., 2012).

222 In particular, we observed higher abundances of *Chloracidobacteria* in attached vs.  
223 planktonic microbiomes within both nearshore and inland zones (Table 1). Biofilm communities,  
224 common to hyporheic zones, consist of a mixture of eukaryotic and prokaryotic organisms  
225 embedded in a porous extracellular matrix and contain diverse organisms with complementary  
226 metabolisms (Battin et al., 2016). *Chloracidobacteria* were prevalent in attached microbiomes  
227 (*i.e.*, within biofilms) and are thought to be photoheterotrophs (Bryant et al., 2007; Tank and  
228 Bryant, 2015) that can utilize non-visible near-infrared light as an energy source for growth  
229 (Behrendt et al., 2012). While these properties may confer advantages in subsurface sediment  
230 conditions with low levels of visible light, our environments experience virtually no light, and  
231 their prevalence suggests possible alternative physiologies for these organisms in subsurface  
232 habitats.

233 Inland communities, characterized by a low-C, high ionic strength environment, also  
234 contained many unique taxa relative to river and nearshore microbiomes (Table 1). Stegen *et al.*  
235 (2012) have proposed stochastic assembly processes as a major influence in this zone, and a  
236 smaller influence of homogenous selection in the inland zone relative to other zones may be  
237 reflective of niche diversification (Table 2). In particular, we observed members of the candidate  
238 phylum *OP3* in high abundance in the inland zone. *OP3* has been shown to be abundant in other  
239 subsurface communities with high inorganic C concentrations (Emerson et al., 2015) and appears  
240 to thrive in low oxygen environments, potentially utilizing anaerobic metabolisms reliant on iron,  
241 manganese, and/or sulfur cycling (Glöckner et al., 2010). Our inland zone is characterized by  
242 high levels of inorganic C but remains oxygenated year round (Table S1), and our research  
243 suggests that *OP3* may be able to persist under a broader range of redox conditions than  
244 currently recognized. Further, nitrifying organisms *Thaumarchaeota* and *Nitrospira* were

245 prevalent in the inland zone. These organisms are not dependent on external organic material,  
246 and instead fix CO<sub>2</sub> through autotrophic pathways involving NH<sub>4</sub><sup>+</sup> and NO<sub>2</sub><sup>-</sup> oxidation. The  
247 unique physicochemical environment of the inland zone may therefore exclude heterotrophic  
248 organisms that are dominant in the nearshore and river zones and favor organisms with  
249 physiologies that align with oligotrophic conditions.

250         Despite pronounced biogeographical patterns in microbiomes, our results indicate some  
251 common selective features and/or dispersal routes across geographic zones and habitat types. We  
252 observed high abundances of *Proteobacteria* and members of the PVC superphyla in all data  
253 subsets, and *Bacteroidetes* was among the most abundant phyla in both planktonic and attached  
254 microbiomes in nearshore and river zones (Table 1). *Proteobacteria* are prominent community  
255 members in other aquatic systems (Cottrell and Kirchman, 2000; Zwart et al., 2002; Battin et al.,  
256 2016) and exhibit pronounced metabolic flexibility (Brenner et al., 2005). The ability of these  
257 organisms to assimilate low-energy substrates, such as sulfate, nitrate, and inorganic C, in  
258 addition to a range of organic C compounds may contribute to their abilities to thrive across  
259 physicochemically-distinct geographic zones. For example, *Alphaproteobacteria* can degrade  
260 chemically-complex humic substances as well as monomers (Newton et al., 2011; Battin et al.,  
261 2016), and *Betaproteobacteria* exhibit diverse heterotrophic metabolisms (Amakata et al., 2005;  
262 Yang et al., 2005; Sato et al., 2009; Battin et al., 2016). *Gammaproteobacteria* can fix inorganic  
263 C in light-limited environments (Dyksma et al., 2016) as well as process organic C (Nikrad et al.,  
264 2014). Likewise, *Deltaproteobacteria* utilize organic molecules as carbon sources and as  
265 electron donors for sulfate- and iron-reduction (Lovley et al., 1998; Torres et al., 2010),  
266 reflecting adaptations to both high- and low-C environments. Microbiomes with a diverse  
267 community of *Proteobacteria* may therefore be well-adapted to fluctuations in organic C

268 availability, facilitating their persistence across all geographic zones. Moreover, *Bacterioidetes*  
269 has been shown to be prevalent in both planktonic and biofilm microbiomes in other systems—  
270 preferentially degrading recalcitrant C compounds and recycling biomass (Cottrell and  
271 Kirchman, 2000; Fernández-Gómez et al., 2013; Martin et al., 2015; Bennke et al., 2016). The  
272 presence of *Bacteroidetes* in addition to *Proteobacteria* within nearshore and river microbiomes  
273 may therefore indicate niche complementarity within these higher-C environments.

274         Additionally, members of the PVC superphyla were abundant in all data subsets and  
275 possess distinctive physiologies. Many of these organisms have a proteinaceous membrane  
276 conveying antibiotic resistance (Fuerst and Sagulenko, 2011; Speth et al., 2012) and/or  
277 metabolize C1 compounds such as methane (Dunfield et al., 2007; Fuerst and Sagulenko, 2011;  
278 Sharp et al., 2013). Although the biogeochemical implications of selection for these organisms  
279 are unexplored, their unique ecology, ability to consume methane, and abundance within our  
280 system merits future investigating into their role in C cycling in hyporheic environments.

281

282 *Microbiome assembly and spatiotemporal dynamics.*

283         Given variation among microbiomes, we investigated assembly processes structuring  
284 microbiomes and found a predominant role for deterministic assembly processes in all data  
285 subsets. In particular, attached communities were nearly entirely assembled by homogeneous  
286 selective pressures and displayed network topologies indicating a highly-structured microbiome  
287 (*i.e.*, high clustering coefficient and low heterogeneity, Table S3). Our results are consistent with  
288 a recent review that noted the prevalence of deterministic processes over stochasticity in  
289 structuring stream-associated biofilm microbiomes (Battin et al., 2016). Battin *et al.* (2016)  
290 suggest micro-niches in biofilms select for specific organisms and repel poorly-adapted

291 immigrating species. Indeed, substrate features may impose strong environmental filters on  
292 microbiomes—sediment geochemistry (Carson et al., 2007; Jorgensen et al., 2012) and matrix  
293 structure (Vos et al., 2013; Breulmann et al., 2014) can select for traits that enhance attachment  
294 on a particular substrate.

295         Likewise, river planktonic microbiomes were assembled via homogeneous selection  
296 across time but were differentiated from nearshore and inland zone microbiomes via dispersal  
297 limitation (Table 2). Network structure was also consistent with a highly-organized river  
298 microbiome (*i.e.*, high clustering coefficient and low heterogeneity, Table S3). A relatively  
299 stable geochemical environment in the river may provide a steady selective environment despite  
300 seasonal changes in temperature (Table S1, Fig. 1C). In particular, NPOC concentration was  
301 approximately 2-5 times higher in river water than the nearshore and inland aqueous  
302 environments. Furthermore, organic C associated with surface water intrusion is correlated with  
303 short-term increases in deterministic assembly processes and changes in microbiome  
304 composition in our nearshore environment (Stegen et al., 2016). Thus, consistently high NPOC  
305 concentration in the river may impose environmental filters for free-living heterotrophic  
306 organisms within river bacterioplankton, resulting in homogeneous selection through time.  
307 Moreover, distinct river physicochemistry, as compared to nearshore and inland zones (Table  
308 S1), may limit successful colonization of planktonic river-associated taxa within other zones.

309         Although deterministic assembly processes were prevalent forces in structuring  
310 microbiomes, nearshore and inland planktonic microbiomes showed a greater influence of  
311 stochastic assembly processes than other zones. Within the nearshore, significant fluxes of both  
312 groundwater and surface water may contribute to spatial assembly processes. For example, we  
313 observed the impact of both dispersal limitation and homogenizing dispersal on nearshore

314 planktonic microbiomes, suggesting that this zone may experience periods of comparatively low  
315 and high rates of hydrologic transport. Furthermore, sampling locations for inland planktonic  
316 microbiomes were distributed across a broader spatial extent than any other zone, perhaps  
317 facilitating limited dispersal across the sampled domain.

318         When we examined assembly processes differentiating planktonic microbiomes across  
319 zones, we anticipated more impact from spatial processes due to an increase in geographic scale.  
320 In contrast to this expectation, selection was responsible for more than 50% of community  
321 dissimilarity in all comparisons. While we have suggested physical inhibition of microbial  
322 dispersal as a possible mechanism generating microbiome dissimilarity across geographic zones,  
323 our analyses indicate that an overarching influence of selection generally outweighed influences  
324 of spatial processes. Our results do not necessarily indicate that spatial processes play no role in  
325 shaping microbiomes, but rather that local physicochemical environments limit the ability of  
326 physically-transported microorganisms to outcompete local biota. Indeed, nearshore-to-inland  
327 zones comparisons suggested that distinct selective pressures in each environment were the  
328 dominant cause (>90%) of differences among planktonic microbiomes.

329         Likewise, spatial processes were overwhelmed by selection in nearshore-to-river  
330 comparisons. Differences among these microbiomes were due to relatively even proportions of  
331 homogenous and variable selection, with no evident seasonal trends in the balance between these  
332 processes. Our system is characterized by pronounced geomorphic heterogeneity in the  
333 subsurface environment that creates preferential flow paths for groundwater-surface water  
334 mixing (Johnson et al., 2015). The presence of both homogeneous and variable selection may  
335 indicate spatial variation in surface water intrusion or local biogeochemical conditions across our  
336 sampling locations (distributed parallel to the river across a distance of ~150m). Homogenizing

337 dispersal also had a small but detectable influence in nearshore-to-river comparisons, supporting  
338 some hydrologic transport of microorganisms between these zones.

339         Lastly, assembly relationships between the inland and river zones provide the strongest  
340 evidence for spatial processes in our system (42.5% stochasticity). In particular, inland-to-river  
341 comparisons yielded the largest impact of dispersal limitation (26.8%), supporting a decay of  
342 community similarity across increasing spatial distances (Green and Bohannan, 2006). Dispersal  
343 limitation is, therefore, likely to play a more significant role in subsurface microbiome assembly  
344 at larger spatial scales.

345

346 *Spatiotemporal environmental correlations and keystone taxa.*

347         Given pervasive deterministic assembly, we examined physicochemical properties related  
348 to changes in microbiome composition in each data subset. Co-occurrence networks fragment  
349 into clusters that are sensitive to variation in hydrological regimes (Widder et al., 2014; Febria et  
350 al., 2015) and have been used to identify keystone taxa (González et al., 2010; Vick-Majors et  
351 al., 2014; Banerjee et al., 2015; Banerjee et al., 2016). Here, we examined relationships between  
352 temporal co-occurrence networks and aqueous physicochemistry to identify organisms  
353 associated with seasonal environmental and hydrologic change.

354         In attached microbiomes, no relationships were present in the inland zone, but we found  
355 that nearshore attached cluster 1 was favored during early season conditions with pronounced  
356 surface water intrusion and low temperature (Fig. 2A-D). Clusters of organisms can denote both  
357 positive and negative co-occurrence patterns, signifying similar or opposite (respectively)  
358 ecological dynamics influencing taxa. For instance, organisms sharing a cluster may constitute  
359 an ecological niche, whereby organisms either co-occur in similar environments or have



360 beneficial interactions (e.g., mutualisms)(Shi et al., 2016). Alternatively, clusters may contain  
361 organisms that are favored under opposing environmental conditions or have negative  
362 interactions (e.g., competition, predation). Nearshore attached cluster 1 contained two  
363 anticorrelated groups of organisms—group 1 consisted of heterotrophic organisms  
364 (*Oxalobacteraceae*, *Comamonadaceae*, *Verrucomicrobiaceae*, and *Flavobacteriaceae*) that  
365 decreased through time, while organisms in group 2 were primarily autotrophic oligotrophs  
366 (*Crenarchaeaceae*, *Ectothiorhodospiraceae*, *Pelagibacteraceae*, and families of  
367 *Alphaproteobacteria*) that increased through time. Because of the abundance of organisms in  
368 group 1 compared to group 2 (4498 vs. 1987), group 1 dictated correlations between this cluster  
369 and the environment, supporting an association between heterotrophic organisms and periods  
370 experiencing relatively high-organic C surface water intrusion. However, as the abundance of  
371 cluster 1 declined in concert with groundwater intrusion into the nearshore environment (Fig.  
372 3A-D), organisms in group 2 increased, putatively outcompeting heterotrophic organisms in  
373 group 1 under more oligotrophic conditions. The co-association of heterotrophic and autotrophic  
374 organisms within a single cluster may indicate comparatively strong tradeoffs between these  
375 lifestyles and merits further investigation into niche dynamics and competitive interactions  
376 between these taxa. Further, we identified primary keystone taxa as *Verrucomicrobiaceae* and  
377 *Crenarchaeaceae*, possibly denoting the principal heterotrophic and autotrophic organisms in  
378 groups 1 and 2, respectively.

379 In planktonic microbiomes, we observed relationships between clusters of organisms in  
380 all zones with hydrologic mixing and physicochemistry. Nearshore planktonic cluster 9  
381 displayed a seasonal association with groundwater discharging conditions and high temperature  
382 (Fig. 2E-H). Organisms were assigned to families highly abundant in the inland zone (e.g.,

383 *Thaumarchaeota*, candidate phylum *OP3*, Table 1, Table S4), and keystone taxa, in particular,  
384 belonged to *OP3*. Trends in the relative abundance of this cluster may therefore denote enhanced  
385 dispersal from the inland zone during groundwater discharge and/or a change in selection  
386 favoring these organisms corresponding to physicochemical shifts in nearshore environment. The  
387 inland planktonic microbiome also revealed two clusters related to environmental change.  
388 Cluster 3 was present in low abundance, correlated with higher groundwater contribution and  
389 temperature (Fig. 2I-L), and contained facultative anaerobic microorganisms (*Lentisphaeria*,  
390 *Gemmatimonadetes*, *Anaerolineae*, *Alphaproteobacteria*, *Gammaproteobacteria*, *Chloroflexi*,  
391 *Clostridia*, *Spirochaetes*) and methylotrophs (*Betaproteobacteria*, Table S4). Such organisms are  
392 largely distinct from organisms found in the nearshore and river environments, supporting the  
393 inference that physical and geochemical isolation drives differences between microbiomes. In  
394 contrast, cluster 5 was associated with surface water intrusion and low temperature (cluster 5,  
395 Fig. 2M-P). An influx of surface water-associated NPOC (Fig. 1B) should favor heterotrophic  
396 microorganisms, and cluster 5 contained methanotrophs (*Methylacidiphilae*, *Betaproteobacteria*)  
397 and diverse *Actinobacteria* and *Acidimicrobiia* involved in C cycling, possibly denoting a shift  
398 towards heterotrophy under comparatively high-organic C conditions. While no keystone taxa  
399 were found in cluster 5, *Chloracidobacteria* and a family of *Chloroflexi* were identified in cluster  
400 3, meriting further investigation into their role in the hyporheic environment.

401 Finally, we identified one cluster of diverse river organisms that was positively  
402 associated with  $\text{Cl}^-$  concentration, which may indicate significant groundwater discharge into the  
403 river (Fig. 2Q-T, Table S4). In particular, *Cytophagia* was the most abundant organism in this  
404 cluster and was common in the nearshore and river zones, but all other families in this cluster  
405 were primarily found in the inland zone. These inland taxa were, however, in low abundance in

406 the river and may therefore indicate a small contribution of the inland microbiome to river  
407 communities under discharging conditions. No keystone taxa were found in this cluster.

408

409 *Functional implications.*

410 We further investigated the involvement of each cluster in microbial metabolism and  
411 found only one cluster—cluster 1 of nearshore attached microorganisms—that correlated with  
412 active biomass (ATP) and aerobic respiration (Raz). Positive correlations between cluster 1 and  
413 both ATP and Raz (Fig. 3) indicate that organisms within this cluster are either responsible for  
414 biomass growth and aerobic nutrient cycling or are facilitated by conditions under which these  
415 processes are promoted. Physical heterogeneity within sediments increases the rate and diversity  
416 of compounds metabolized in biofilms (Singer et al., 2010), an effect that has been attributed to  
417 complementary resource use and niche diversification (Battin et al., 2016). In particular, the  
418 spatial organization of biofilms and the ability of microorganisms to excrete extracellular  
419 enzymes can allow for complementarity that enhances rates of metabolism (Loreau et al., 2001;  
420 Naeem et al., 2012). Nearshore attached cluster 1 contains organisms with a broad range of  
421 metabolic capabilities and may therefore constitute the foundation (or portion thereof) of this  
422 complementary resource structure.

423

424 *Conclusions*

425 Our results generate new hypotheses regarding spatiotemporal dynamics in hyporheic  
426 environments (Fig. 5A-B). We advance that spatial and temporal patterns in ecological selection  
427 impose strong environmental filters in hyporheic zones, limiting successful immigration of  
428 organisms across physicochemical gradients (Fig. 5A). However, despite largely distinct

429 microbiomes, we reveal common taxa across a geographic continuum from groundwater- to  
430 surface water-dominated habitats. We also identify clusters of organisms, and keystone taxa  
431 therein, that change through seasonally dynamic groundwater-surface water mixing conditions,  
432 providing insight into microbial physiologies in each geographic zone. In particular, one cluster  
433 of attached organisms in the nearshore environment suggests a seasonal tradeoff between  
434 heterotrophic and autotrophic organisms in our system. We therefore propose that comparatively  
435 high-organic C conditions during surface water intrusion into the hyporheic zone support  
436 heterotrophy, succumbing to autotrophy during time periods of groundwater discharge (Fig. 5B).  
437 This cluster also correlated with enhanced rates of microbial metabolism, suggesting a critical  
438 biogeochemical role for taxa within this cluster. Together, our results provide evidence for  
439 deterministic assembly processes in hyporheic environments, despite pronounced hydrologic  
440 connectivity, and further a process-based understanding of spatiotemporal patterns in  
441 microbiomes in a critical environmental transition zone.

442

## 443 **Experimental Procedures.**

### 444 *Study Design.*

445 This study was conducted in three geographic zones (inland, nearshore, river) within the  
446 Hanford 300A (approximately 46° 22' 15.80"N, 119° 16' 31.52"W) in eastern Washington State  
447 (Slater et al., 2010; Zachara et al., 2013; described in Graham et al., 2016a). The inland zone lies  
448 within 250m of the Columbia River and is characterized by an unconfined groundwater aquifer  
449 in the Hanford formation. It displays relatively stable temperatures (~15°C) and elevated  
450 concentrations of anions and inorganic carbon relative to other zones (Table S1). In contrast, the  
451 Columbia River contains higher organic carbon and lower ion concentrations with seasonally

452 variable temperatures. Surface water from the river and groundwater from the inland zone mix in  
453 the nearshore hyporheic zone. At high river stages, surface water intrudes into the inland zone;  
454 and at low river stages, groundwater discharges into the Columbia River. To monitor  
455 groundwater-surface water mixing, we employed Cl<sup>-</sup> as a conservative groundwater tracer per  
456 Stegen *et al.* (2016).

457 Detailed sampling and analytical methods are in the Supplemental Material. Briefly,  
458 attached (nearshore and inland only) and planktonic (all zones) microbiomes were obtained from  
459 deployed colonization substrate and aqueous samples, respectively. Colonization substrate was  
460 incubated *in situ* six weeks prior to removal. Samples were collected at three-week intervals  
461 from March through November 2014, with the first planktonic samples collected in March and  
462 the first attached samples collected in April after a six-week incubation period. Attached samples  
463 were obtained from fully screened stainless steel piezometers installed to 1.2m depth below the  
464 riverbed (nearshore, 5.25cm inside diameter (MAAS Midwest, Huntley, IL)) or from established  
465 groundwater wells (inland). Planktonic samples were obtained from galvanized piezometers  
466 located <1m from the piezometers used to sample attached microbiomes. For each inland  
467 location, a single well was used for both planktonic and attached samples. River water was  
468 sampled adjacent to the piezometers. DNA was extracted from each sample using the MoBio  
469 PowerSoil kit (MoBio Laboratories, Inc., Carlsbad, CA), and the 16S rRNA gene was sequenced  
470 on the Illumina MiSeq platform as described in the Supplemental Material. Physicochemical  
471 properties, active biomass (ATP), and aerobic respiration (Raz) were determined as per the  
472 Supplemental Material.

473

474 *Statistical analysis.*

475 All analyses were conducted in R software (<http://cran.r-project.org/>) unless otherwise  
476 noted. Relative abundances of major microbial taxa at phylum- and class- levels were calculated  
477 in each of five data subsets (nearshore attached, nearshore planktonic, inland attached, inland  
478 planktonic, river planktonic). An apparent breakpoint in hydrology at July 22 was assessed by  
479 comparing CI and NPOC concentration pre- and post- July 22 with one-sided Mann Whitney U  
480 tests. Temporal changes in temperature in each subset were assessed with quadratic regressions.  
481 Microbiome dissimilarities were estimated as Bray-Curtis distance and analyzed through time  
482 and across data subsets with PERMANOVA in QIIME (Caporaso et al., 2010).

483

#### 484 *Modeling assembly processes.*

485 We implemented null modeling methods developed by Stegen *et al.* (2013; 2015) to  
486 disentangle community assembly processes. The approach uses pairwise phylogenetic turnover  
487 between communities, calculated using the mean-nearest-taxon-distance ( $\beta$ MNTD) metric  
488 (Webb et al., 2008; Fine and Kembel, 2011), to infer the strength of selection. Communities were  
489 evaluated for significantly less turnover than expected ( $\beta$ NTI < -2, homogeneous selection) or  
490 more turnover than expected ( $\beta$ NTI > 2, variable selection) by comparing observed  $\beta$ MNTD  
491 values to the mean of a null distribution of  $\beta$ MNTD values—and normalizing by its standard  
492 deviation—to yield  $\beta$ NTI (Stegen et al., 2012). Pairwise community comparisons that did not  
493 deviate from the null  $\beta$ MNTD distribution were evaluated for the influences of dispersal  
494 limitation and homogenizing dispersal by calculating the Raup-Crick metric extended to account  
495 for species relative abundances ( $RC_{\text{bray}}$ ), as per Stegen *et al.* (2013; 2015). Observed Bray-Curtis  
496 dissimilarities were compared to the null distribution to derive  $RC_{\text{bray}}$ .  $RC_{\text{bray}}$  values that were >  
497 0.95, > -0.95 and < 0.95, or < -0.95 were interpreted as indicating dispersal limitation, no

498 dominant assembly process, or homogenizing dispersal, respectively. Significance levels for  
499  $\beta$ NTI and  $RC_{\text{bray}}$  are respectively based on standard deviations— $|\beta\text{NTI}| = 2$  denotes two standard  
500 deviations from the mean of the null distribution—and alpha values— $|RC_{\text{bray}}| = 0.95$  reflects  
501 significance at the 0.05 level. Inferences from both  $\beta$ NTI and  $RC_{\text{bray}}$  have previously been  
502 shown to be robust (Dini-Andreote et al., 2015; Stegen et al., 2015).

503

504 *Co-occurrence network analysis.*

505 Co-occurrence networks were constructed using Spearman's correlation at four  
506 taxonomic levels – class, order, family, and OTU (singletons removed). To examine taxa with  
507 moderate to strong co-occurrence patterns, correlations with  $rho > +/- 0.6$  and FRD-corrected  $P$   
508  $< 0.01$  were imported into Cytoscape v3.3 for visualization and calculation of network  
509 parameters. Networks were examined for deviations from randomness by comparing network  
510 parameters to random networks generated with Network Randomiser 1.1 in Cytoscape (Barabasi-  
511 Albert model with same number of nodes). Keystone taxa were identified using the Betweenness  
512 Centrality metric ( $BC > 0$ ), whereby increasing BC values indicate greater contribution of nodes  
513 to network structure (González et al., 2010; Vick-Majors et al., 2014; Banerjee et al., 2016).

514 We identified clusters in Cytoscape using MCODE, using default parameters as per  
515 Banerjee *et al.* (2015; 2016). We then calculated Pearson's momentum correlation between the  
516 relative abundance of each cluster and selected parameters (CI, NPOC, temperature, ATP, and  
517 Raz) to screen for clusters of interest ( $P < 0.05$ ). Regression models (linear and quadratic, as  
518 appropriate) were then fit between cluster abundance (dependent variable) and the selected  
519 parameters (independent variables). Analyses were conducted at all taxonomic levels, but we  
520 present family-level correlations of microbiomes with time and physicochemistry due to the

521 consistency of patterns. For correlations with microbiome activity and aerobic respiration, results  
522 with were similar at family- and class-levels (Fig. S2 and Table S2), and we present class-level  
523 results that exhibited better model fit.

524

525 **Acknowledgements.**

526 This research was supported by the US Department of Energy (DOE), Office of  
527 Biological and Environmental Research (BER), as part of Subsurface Biogeochemical  
528 Research Program's Scientific Focus Area (SFA) at the Pacific Northwest National  
529 Laboratory (PNNL). PNNL is operated for DOE by Battelle under contract  
530 DE-AC06-76RLO 1830. A portion of the research was performed using Institutional  
531 Computing at PNNL.

532



533

534 **References.**

- 535 Adams, R.I., Miletto, M., Taylor, J.W., and Bruns, T.D. (2013) Dispersal in microbes: fungi in  
536 indoor air are dominated by outdoor air and show dispersal limitation at short distances. *The*  
537 *ISME journal* **7**: 1262-1273.
- 538 Amakata, D., Matsuo, Y., Shimono, K., Park, J.K., Yun, C.S., Matsuda, H. et al. (2005)  
539 *Mitsuaria chitosanitabida* gen. nov., sp. nov., an aerobic, chitosanase-producing member of  
540 the ‘Betaproteobacteria’. *International journal of systematic and evolutionary microbiology*  
541 **55**: 1927-1932.
- 542 Banerjee, S., Kirkby, C.A., Schmutter, D., Bissett, A., Kirkegaard, J.A., and Richardson, A.E.  
543 (2016) Network analysis reveals functional redundancy and keystone taxa amongst bacterial  
544 and fungal communities during organic matter decomposition in an arable soil. *Soil Biology*  
545 *and Biochemistry* **97**: 188-198.
- 546 Banerjee, S., Baah - Acheamfour, M., Carlyle, C.N., Bissett, A., Richardson, A.E., Siddique, T.  
547 et al. (2015) Determinants of bacterial communities in Canadian agroforestry systems.  
548 *Environmental microbiology*.
- 549 Bärlocher, F., Nikolcheva, L.G., Wilson, K.P., and Williams, D.D. (2006) Fungi in the hyporheic  
550 zone of a springbrook. *Microbial ecology* **52**: 708-715.
- 551 Battin, T.J., Besemer, K., Bengtsson, M.M., Romani, A.M., and Packmann, A.I. (2016) The  
552 ecology and biogeochemistry of stream biofilms. *Nature Reviews Microbiology* **14**: 251-263.
- 553 Behrendt, L., Larkum, A.W., Trampe, E., Norman, A., Sørensen, S.J., and Kühl, M. (2012)  
554 Microbial diversity of biofilm communities in microniches associated with the didemnid  
555 ascidian *Lissoclinum patella*. *The ISME journal* **6**: 1222-1237.
- 556 Bennke, C.M., Krüger, K., Kappelmann, L., Huang, S., Gobet, A., Schüller, M. et al. (2016)  
557 Polysaccharide utilisation loci of Bacteroidetes from two contrasting open ocean sites in the  
558 North Atlantic. *Environmental Microbiology*.
- 559 Boano, F., Harvey, J.W., Marion, A., Packman, A.I., Revelli, R., Ridolfi, L., and Wörman, A.  
560 (2014) Hyporheic flow and transport processes: Mechanisms, models, and biogeochemical  
561 implications. *Reviews of Geophysics* **52**: 603-679.
- 562 Boulton, A.J., Datry, T., Kasahara, T., Mutz, M., and Stanford, J.A. (2010) Ecology and  
563 management of the hyporheic zone: stream-groundwater interactions of running waters and  
564 their floodplains. *Journal of the North American Benthological Society* **29**: 26-40.
- 565 Brenner, D.J., Krieg, N., Staley, J., and Garrity, G. (2005) Bergey’s Manual of Systematic  
566 Bacteriology, Vol 2: The Proteobacteria. NY: Springer.
- 567 Breulmann, M., Masyutenko, N.P., Kogut, B.M., Schroll, R., Dörfler, U., Buscot, F., and Schulz,  
568 E. (2014) Short-term bioavailability of carbon in soil organic matter fractions of different  
569 particle sizes and densities in grassland ecosystems. *Science of The Total Environment* **497**:  
570 29-37.
- 571 Brunke, M. (1999) Colmation and depth filtration within streambeds: retention of particles in  
572 hyporheic interstices. *International Review of Hydrobiology* **84**: 99-117.
- 573 Bryant, D.A., Costas, A.M.G., Maresca, J.A., Chew, A.G.M., Klatt, C.G., Bateson, M.M. et al.  
574 (2007) *Candidatus Chloracidobacterium thermophilum*: an aerobic phototrophic  
575 acidobacterium. *Science* **317**: 523-526.

- 576 Caporaso, J.G., Kuczynski, J., Stombaugh, J., Bittinger, K., Bushman, F.D., Costello, E.K. et al.  
577 (2010) QIIME allows analysis of high-throughput community sequencing data. *Nature*  
578 *methods* **7**: 335-336.
- 579 Carson, J.K., Rooney, D., Gleeson, D.B., and Clipson, N. (2007) Altering the mineral  
580 composition of soil causes a shift in microbial community structure. *FEMS microbiology*  
581 *ecology* **61**: 414-423.
- 582 Cline, L.C., and Zak, D.R. (2014) Dispersal limitation structures fungal community assembly in  
583 a long - term glacial chronosequence. *Environmental microbiology* **16**: 1538-1548.
- 584 Cornut, J., Chauvet, E., Mermillod-Blondin, F., Assemat, F., and Elger, A. (2014) Aquatic  
585 Hyphomycete Species Are Screened by the Hyporheic Zone of Woodland Streams. *Applied*  
586 *and environmental microbiology* **80**: 1949-1960.
- 587 Cottrell, M.T., and Kirchman, D.L. (2000) Natural assemblages of marine proteobacteria and  
588 members of the Cytophaga-Flavobacter cluster consuming low-and high-molecular-weight  
589 dissolved organic matter. *Applied and Environmental Microbiology* **66**: 1692-1697.
- 590 Dini-Andreote, F., Stegen, J.C., van Elsas, J.D., and Salles, J.F. (2015) Disentangling  
591 mechanisms that mediate the balance between stochastic and deterministic processes in  
592 microbial succession. *Proceedings of the National Academy of Sciences* **112**: E1326-E1332.
- 593 Dunfield, P.F., Yuryev, A., Senin, P., Smirnova, A.V., Stott, M.B., Hou, S. et al. (2007) Methane  
594 oxidation by an extremely acidophilic bacterium of the phylum Verrucomicrobia. *Nature*  
595 **450**: 879-882.
- 596 Dykstra, S., Bischof, K., Fuchs, B.M., Hoffmann, K., Meier, D., Meyerdierks, A. et al. (2016)  
597 Ubiquitous Gammaproteobacteria dominate dark carbon fixation in coastal sediments. *The*  
598 *ISME journal*.
- 599 Emerson, J.B., Thomas, B.C., Alvarez, W., and Banfield, J.F. (2015) Metagenomic analysis of a  
600 high carbon dioxide subsurface microbial community populated by chemolithoautotrophs  
601 and bacteria and archaea from candidate phyla. *Environmental microbiology*.
- 602 Febria, C.M., Beddoes, P., Fulthorpe, R.R., and Williams, D.D. (2012) Bacterial community  
603 dynamics in the hyporheic zone of an intermittent stream. *The ISME journal* **6**: 1078-1088.
- 604 Febria, C.M., Hosen, J.D., Crump, B.C., Palmer, M.A., and Williams, D.D. (2015) Microbial  
605 responses to changes in flow status in temporary headwater streams: a cross-system  
606 comparison. *Frontiers in microbiology* **6**: 522.
- 607 Fernández-Gómez, B., Richter, M., Schöler, M., Pinhassi, J., Acinas, S.G., González, J.M., and  
608 Pedrós-Alió, C. (2013) Ecology of marine Bacteroidetes: a comparative genomics approach.  
609 *The ISME journal* **7**: 1026-1037.
- 610 Ferrenberg, S., O'Neill, S.P., Knelman, J.E., Todd, B., Duggan, S., Bradley, D. et al. (2013)  
611 Changes in assembly processes in soil bacterial communities following a wildfire  
612 disturbance. *The ISME journal* **7**: 1102-1111.
- 613 Fierer, N., and Jackson, R.B. (2006) The diversity and biogeography of soil bacterial  
614 communities. *Proceedings of the National Academy of Sciences of the United States of*  
615 *America* **103**: 626-631.
- 616 Fine, P.V.A., and Kembel, S.W. (2011) Phylogenetic community structure and phylogenetic  
617 turnover across space and edaphic gradients in western Amazonian tree communities.  
618 *Ecography* **34**: 552-565.
- 619 Fuerst, J.A., and Sagulenko, E. (2011) Beyond the bacterium: planctomycetes challenge our  
620 concepts of microbial structure and function. *Nature Reviews Microbiology* **9**: 403-413.

- 621 Fukami, T. (2004) Assembly history interacts with ecosystem size to influence species diversity.  
622 *Ecology* **85**: 3234-3242.
- 623 Fukami, T., Dickie, I.A., Paula Wilkie, J., Paulus, B.C., Park, D., Roberts, A. et al. (2010)  
624 Assembly history dictates ecosystem functioning: evidence from wood decomposer  
625 communities. *Ecology Letters* **13**: 675-684.
- 626 Glöckner, J., Kube, M., Shrestha, P.M., Weber, M., Glöckner, F.O., Reinhardt, R., and Liesack,  
627 W. (2010) Phylogenetic diversity and metagenomics of candidate division OP3.  
628 *Environmental microbiology* **12**: 1218-1229.
- 629 Gonzalez, A., and Bell, G. (2013) Evolutionary rescue and adaptation to abrupt environmental  
630 change depends upon the history of stress. *Philosophical Transactions of the Royal Society of*  
631 *London B: Biological Sciences* **368**: 20120079.
- 632 González, A.M.M., Dalsgaard, B., and Olesen, J.M. (2010) Centrality measures and the  
633 importance of generalist species in pollination networks. *Ecological Complexity* **7**: 36-43.
- 634 Graham, E., Crump, A.R., Resch, C.T., Fansler, S., Arntzen, E., Kennedy, D. et al. (2016a)  
635 Coupling spatiotemporal community assembly processes to changes in microbial  
636 metabolism. *PeerJ Preprints*.
- 637 Graham, E.B., Knelman, J.E., Schindlbacher, A., Siciliano, S., Breulmann, M., Yannarell, A. et  
638 al. (2016b) Microbes as engines of ecosystem function: when does community structure  
639 enhance predictions of ecosystem processes? *Frontiers in Microbiology* **7**.
- 640 Green, J., and Bohannan, B.J. (2006) Spatial scaling of microbial biodiversity. *Trends in ecology*  
641 *& evolution* **21**: 501-507.
- 642 Hancock, P.J., Boulton, A.J., and Humphreys, W.F. (2005) Aquifers and hyporheic zones:  
643 towards an ecological understanding of groundwater. *Hydrogeology Journal* **13**: 98-111.
- 644 Hartwig, M., and Borchardt, D. (2014) Alteration of key hyporheic functions through biological  
645 and physical clogging along a nutrient and fine - sediment gradient. *Ecohydrology*.
- 646 Hedin, L.O., von Fischer, J.C., Ostrom, N.E., Kennedy, B.P., Brown, M.G., and Robertson, G.P.  
647 (1998) Thermodynamic constraints on nitrogen transformations and other biogeochemical  
648 processes at soil-stream interfaces. *Ecology* **79**: 684-703.
- 649 Johnson, T., Versteeg, R., Thomle, J., Hammond, G., Chen, X., and Zachara, J. (2015) Four -  
650 dimensional electrical conductivity monitoring of stage - driven river water intrusion:  
651 Accounting for water table effects using a transient mesh boundary and conditional inversion  
652 constraints. *Water Resources Research* **51**: 6177-6196.
- 653 Jorgensen, S.L., Hannisdal, B., Lanzén, A., Baumberger, T., Flesland, K., Fonseca, R. et al.  
654 (2012) Correlating microbial community profiles with geochemical data in highly stratified  
655 sediments from the Arctic Mid-Ocean Ridge. *Proceedings of the National Academy of*  
656 *Sciences* **109**: E2846-E2855.
- 657 Knelman, J.E., and Nemergut, D.R. (2014) Changes in community assembly may shift the  
658 relationship between biodiversity and ecosystem function. *Frontiers in microbiology* **5**.
- 659 Lauber, C.L., Hamady, M., Knight, R., and Fierer, N. (2009) Pyrosequencing-based assessment  
660 of soil pH as a predictor of soil bacterial community structure at the continental scale.  
661 *Applied and environmental microbiology* **75**: 5111-5120.
- 662 Lin, X., Kennedy, D., Fredrickson, J., Bjornstad, B., and Konopka, A. (2012a) Vertical  
663 stratification of subsurface microbial community composition across geological formations at  
664 the Hanford Site. *Environmental microbiology* **14**: 414-425.

- 665 Lin, X., McKinley, J., Resch, C.T., Kaluzny, R., Lauber, C.L., Fredrickson, J. et al. (2012b)  
666 Spatial and temporal dynamics of the microbial community in the Hanford unconfined  
667 aquifer. *The ISME journal* **6**: 1665-1676.
- 668 Lindström, E.S., and Langenheder, S. (2012) Local and regional factors influencing bacterial  
669 community assembly. *Environmental Microbiology Reports* **4**: 1-9.
- 670 Loreau, M., Naeem, S., Inchausti, P., Bengtsson, J., Grime, J., Hector, A. et al. (2001)  
671 Biodiversity and ecosystem functioning: current knowledge and future challenges. *science*  
672 **294**: 804-808.
- 673 Lovley, D., Fraga, J.L., Blunt-Harris, E.L., Hayes, L., Phillips, E., and Coates, J.D. (1998)  
674 Humic substances as a mediator for microbially catalyzed metal reduction. *Acta*  
675 *hydrochimica et hydrobiologica* **26**: 152-157.
- 676 Marmonier, P., Archambaud, G., Belaidi, N., Bougon, N., Breil, P., Chauvet, E. et al. (2012) The  
677 role of organisms in hyporheic processes: gaps in current knowledge, needs for future  
678 research and applications. In *Annales de Limnologie-International Journal of Limnology*:  
679 Cambridge Univ Press, pp. 253-266.
- 680 Martin, M., Barbeyron, T., Martin, R., Portetelle, D., Michel, G., and Vandenberg, M. (2015) The  
681 Cultivable Surface Microbiota of the Brown Alga *Ascophyllum nodosum* is Enriched in  
682 Macroalgal-Polysaccharide-Degrading Bacteria. *Frontiers in microbiology* **6**.
- 683 Martiny, A.C., Treseder, K., and Pusch, G. (2013) Phylogenetic conservatism of functional traits  
684 in microorganisms. *The ISME journal* **7**: 830-838.
- 685 Martiny, J.B.H., Bohannan, B.J., Brown, J.H., Colwell, R.K., Fuhrman, J.A., Green, J.L. et al.  
686 (2006) Microbial biogeography: putting microorganisms on the map. *Nature Reviews*  
687 *Microbiology* **4**: 102-112.
- 688 McClain, M.E., Boyer, E.W., Dent, C.L., Gergel, S.E., Grimm, N.B., Groffman, P.M. et al.  
689 (2003) Biogeochemical hot spots and hot moments at the interface of terrestrial and aquatic  
690 ecosystems. *Ecosystems* **6**: 301-312.
- 691 Naeem, S., Duffy, J.E., and Zavaleta, E. (2012) The functions of biological diversity in an age of  
692 extinction. *Science* **336**: 1401-1406.
- 693 Nemergut, D.R., Schmidt, S.K., Fukami, T., O'Neill, S.P., Bilinski, T.M., Stanish, L.F. et al.  
694 (2013) Patterns and processes of microbial community assembly. *Microbiology and*  
695 *Molecular Biology Reviews* **77**: 342-356.
- 696 Newton, R.J., Jones, S.E., Eiler, A., McMahon, K.D., and Bertilsson, S. (2011) A guide to the  
697 natural history of freshwater lake bacteria. *Microbiology and Molecular Biology Reviews* **75**:  
698 14-49.
- 699 Nikrad, M.P., Cottrell, M.T., and Kirchman, D.L. (2014) Uptake of dissolved organic carbon by  
700 gammaproteobacterial subgroups in coastal waters of the West Antarctic Peninsula. *Applied*  
701 *and environmental microbiology* **80**: 3362-3368.
- 702 Robertson, A.L., and Wood, P.J. (2010) Ecology of the hyporheic zone: origins, current  
703 knowledge and future directions. *Fundamental and Applied Limnology/Archiv für*  
704 *Hydrobiologie* **176**: 279-289.
- 705 Russell, J., Brady, A., Cardman, Z., Slater, G., Lim, D., and Biddle, J. (2014) Prokaryote  
706 populations of extant microbialites along a depth gradient in Pavilion Lake, British  
707 Columbia, Canada. *Geobiology* **12**: 250-264.
- 708 Sato, K., Kato, Y., Taguchi, G., Nogawa, M., Yokota, A., and Shimosaka, M. (2009)  
709 *Chitiniphilus shinanonensis* gen. nov., sp. nov., a novel chitin-degrading bacterium belonging  
710 to Betaproteobacteria. *The Journal of general and applied microbiology* **55**: 147-153.

- 711 Sharp, C.E., den Camp, H.J.M.O., Tamas, I., and Dunfield, P.F. (2013) Unusual Members of the  
712 PVC Superphylum: The Methanotrophic Verrucomicrobia Genus “Methylacidiphilum”. In  
713 *Planctomycetes: Cell Structure, Origins and Biology*: Springer, pp. 211-227.
- 714 Shi, S., Nuccio, E.E., Shi, Z.J., He, Z., Zhou, J., and Firestone, M.K. (2016) The interconnected  
715 rhizosphere: High network complexity dominates rhizosphere assemblages. *Ecology Letters*.  
716 Singer, G., Besemer, K., Schmitt-Kopplin, P., Hödl, I., and Battin, T.J. (2010) Physical  
717 heterogeneity increases biofilm resource use and its molecular diversity in stream  
718 mesocosms. *PLoS One* **5**: e9988.
- 719 Slater, L.D., Ntarlagiannis, D., Day - Lewis, F.D., Mwakanyamale, K., Versteeg, R.J., Ward, A.  
720 et al. (2010) Use of electrical imaging and distributed temperature sensing methods to  
721 characterize surface water–groundwater exchange regulating uranium transport at the  
722 Hanford 300 Area, Washington. *Water Resources Research* **46**.
- 723 Speth, D.R., van Teeseling, M.C.F., and Jetten, M.S.M. (2012) Genomic analysis indicates the  
724 presence of an asymmetric bilayer outer membrane in Planctomycetes and Verrucomicrobia.  
725 *Frontiers in microbiology* **3**.
- 726 Stegen, J.C., Lin, X., Konopka, A.E., and Fredrickson, J.K. (2012) Stochastic and deterministic  
727 assembly processes in subsurface microbial communities. *The ISME journal* **6**: 1653-1664.
- 728 Stegen, J.C., Lin, X., Fredrickson, J.K., and Konopka, A.E. (2015) Estimating and mapping  
729 ecological processes influencing microbial community assembly. *Frontiers in microbiology*  
730 **6**.
- 731 Stegen, J.C., Lin, X., Fredrickson, J.K., Chen, X., Kennedy, D.W., Murray, C.J. et al. (2013)  
732 Quantifying community assembly processes and identifying features that impose them. *The*  
733 *ISME journal* **7**: 2069-2079.
- 734 Stegen, J.C., Fredrickson, J.K., Wilkins, M.J., Konopka, A.E., Nelson, W.C., Arntzen, E.V. et al.  
735 (2016) Groundwater-surface water mixing shifts ecological assembly processes and  
736 stimulates organic carbon turnover. *Nature Communications* **7**.
- 737 Tank, M., and Bryant, D.A. (2015) Nutrient requirements and growth physiology of the  
738 photoheterotrophic Acidobacterium, *Chloracidobacterium thermophilum*. *Frontiers in*  
739 *microbiology* **6**: 226.
- 740 Torres, C.I., Marcus, A.K., Lee, H.-S., Parameswaran, P., Krajmalnik-Brown, R., and Rittmann,  
741 B.E. (2010) A kinetic perspective on extracellular electron transfer by anode-respiring  
742 bacteria. *FEMS Microbiology Reviews* **34**: 3-17.
- 743 Vick-Majors, T.J., Priscu, J.C., and Amaral-Zettler, L.A. (2014) Modular community structure  
744 suggests metabolic plasticity during the transition to polar night in ice-covered Antarctic  
745 lakes. *The ISME journal* **8**: 778-789.
- 746 Vos, M., Wolf, A.B., Jennings, S.J., and Kowalchuk, G.A. (2013) Micro-scale determinants of  
747 bacterial diversity in soil. *FEMS microbiology reviews* **37**: 936-954.
- 748 Wang, J., Shen, J., Wu, Y., Tu, C., Soininen, J., Stegen, J.C. et al. (2013) Phylogenetic beta  
749 diversity in bacterial assemblages across ecosystems: deterministic versus stochastic  
750 processes. *The ISME journal* **7**: 1310-1321.
- 751 Webb, C.O., Ackerly, D.D., and Kembel, S.W. (2008) Phylocom: software for the analysis of  
752 phylogenetic community structure and trait evolution. *Bioinformatics* **24**: 2098-2100.
- 753 Widder, S., Besemer, K., Singer, G.A., Ceola, S., Bertuzzo, E., Quince, C. et al. (2014) Fluvial  
754 network organization imprints on microbial co-occurrence networks. *Proceedings of the*  
755 *National Academy of Sciences* **111**: 12799-12804.

- 756 Woodcock, S., Besemer, K., Battin, T.J., Curtis, T.P., and Sloan, W.T. (2013) Modelling the  
757 effects of dispersal mechanisms and hydrodynamic regimes upon the structure of microbial  
758 communities within fluvial biofilms. *Environmental microbiology* **15**: 1216-1225.
- 759 Yang, H.-C., Im, W.-T., An, D.-S., Park, W.-s., Kim, I.S., and Lee, S.-T. (2005) *Silvimonas*  
760 *terrae* gen. nov., sp. nov., a novel chitin-degrading facultative anaerobe belonging to the  
761 ‘Betaproteobacteria’. *International journal of systematic and evolutionary microbiology* **55**:  
762 2329-2332.
- 763 Zachara, J.M., Long, P.E., Bargar, J., Davis, J.A., Fox, P., Fredrickson, J.K. et al. (2013)  
764 Persistence of uranium groundwater plumes: Contrasting mechanisms at two DOE sites in  
765 the groundwater–river interaction zone. *Journal of contaminant hydrology* **147**: 45-72.
- 766 Zwart, G., Crump, B.C., Kamst-van Agterveld, M.P., Hagen, F., and Han, S.-K. (2002) Typical  
767 freshwater bacteria: an analysis of available 16S rRNA gene sequences from plankton of  
768 lakes and rivers. *Aquatic Microbial Ecology* **28**: 141-155.
- 769  
770

771 **FIGURES AND TABLES.**

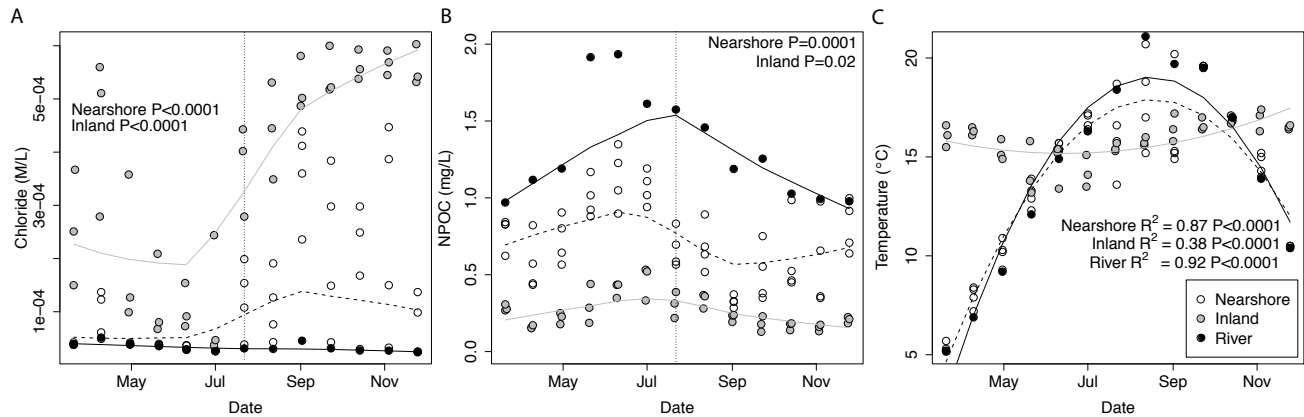

772

773 **Figure 1.** Changes in aqueous physicochemistry through time in each geographic zone are  
774 presented in Figure 1. In the nearshore and inland zones, (A) Cl<sup>-</sup> concentration was higher and  
775 (B) NPOC concentration was lower at and beyond our July 22 sampling event, indicating  
776 groundwater discharging conditions from July 22 onward. Temperature (C) followed a smooth  
777 temporal trajectory in the nearshore and river zones and was comparatively stable in the inland  
778 zone. Lowess smoothers are plotted in panels (A) and (B) and quadratic regressions are plotted in  
779 (C) to aid in visualization. Data from nearshore, inland, and river zones are plotted with open,  
780 gray, and black circles, respectively. River stage dynamics are presented in Figure S1.

781

782

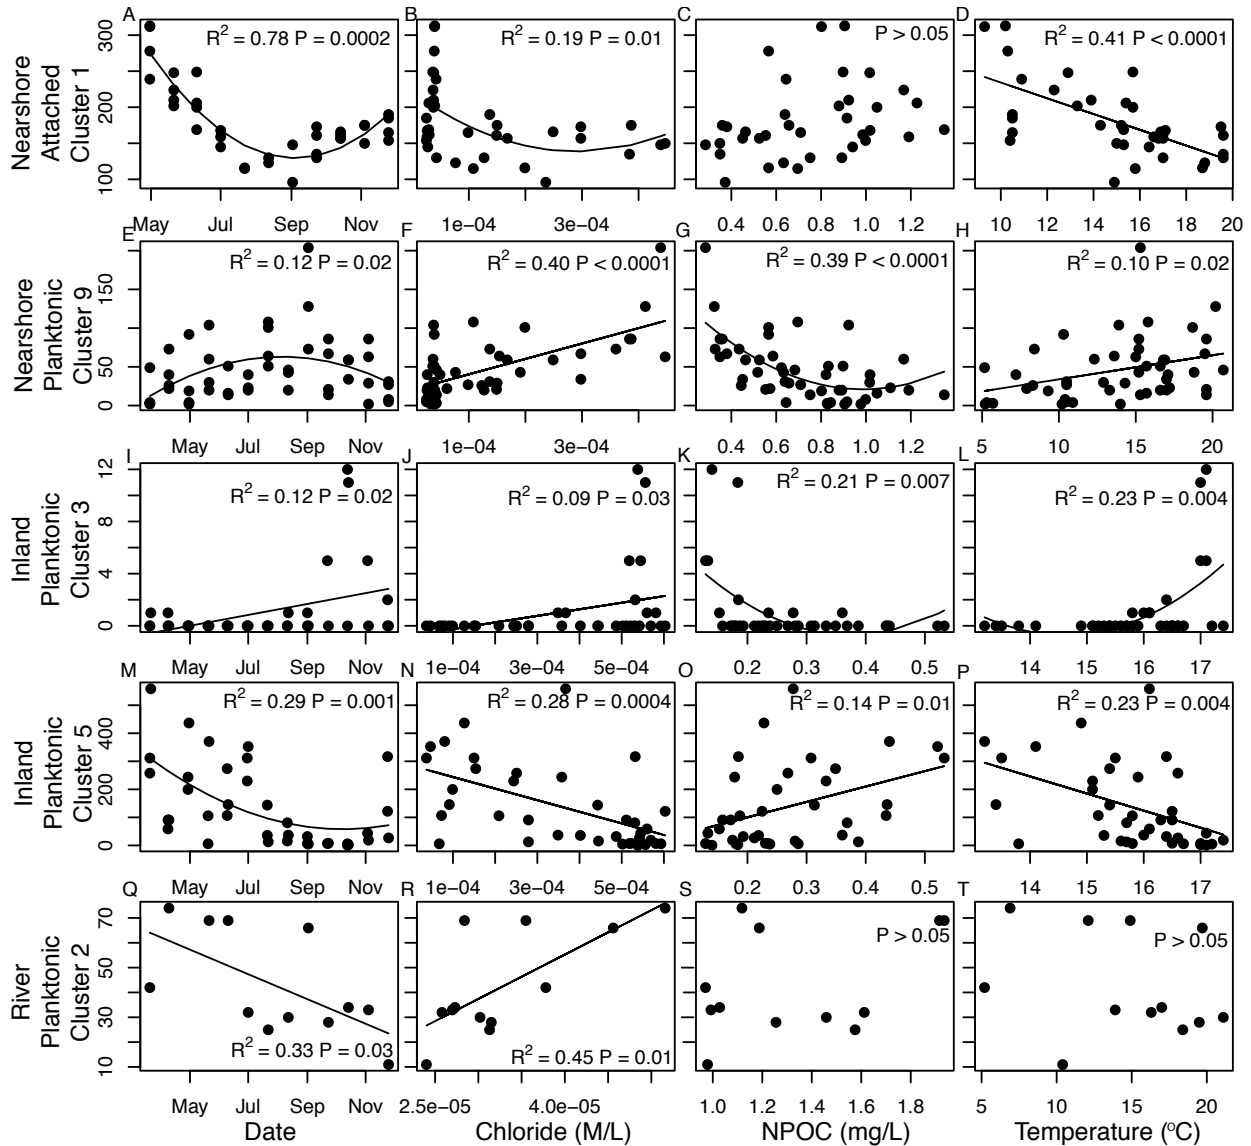

783

784 **Figure 2.** Regressions between the abundance of selected clusters and day of year (column 1),

785 Cl<sup>-</sup> concentration (column 2), non-purgable organic carbon (NPOC) (column 3), and temperature

786 (column 4). Nearshore attached cluster 1 is presented in row 1 (panels A-D), nearshore

787 planktonic cluster 9 is in row 2 (E-H), inland planktonic cluster 3 is in row 3 (I-L), inland

788 planktonic cluster 5 is in row 4 (M-P), and river cluster 2 is in row 5 (Q-T).

789

790



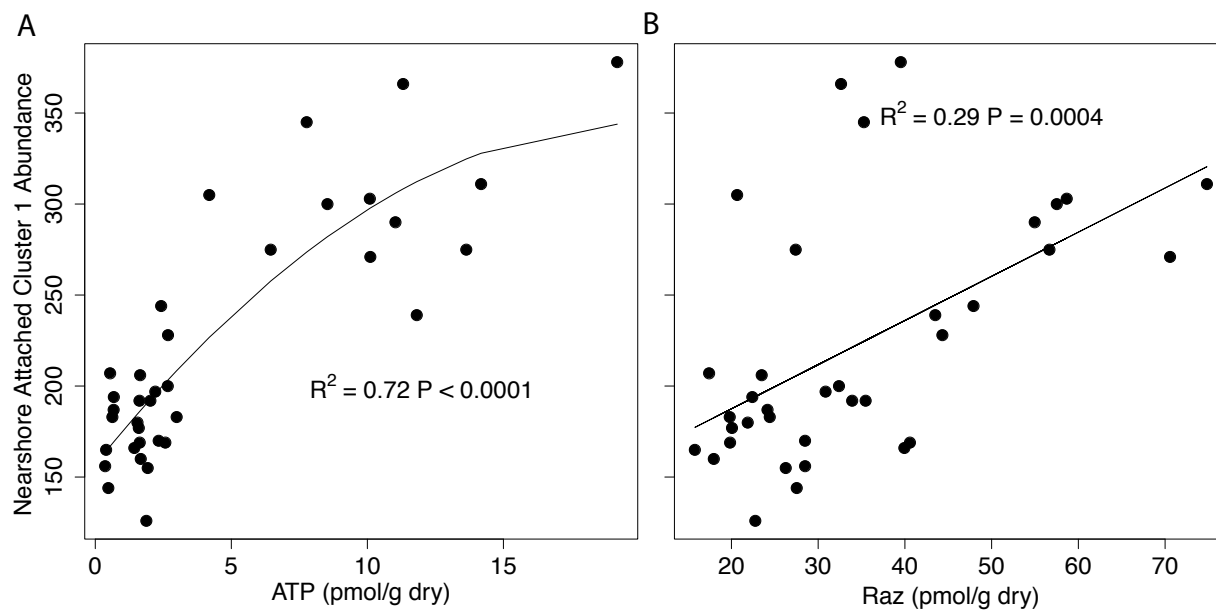

791

792 **Figure 3.** The abundance of attached cluster 1 was positively associated with (A) active

793 microbial biomass and (B) aerobic respiration. Class-level analyses are presented here; family

794 level-analyses are presented in Figure S2.

795

796

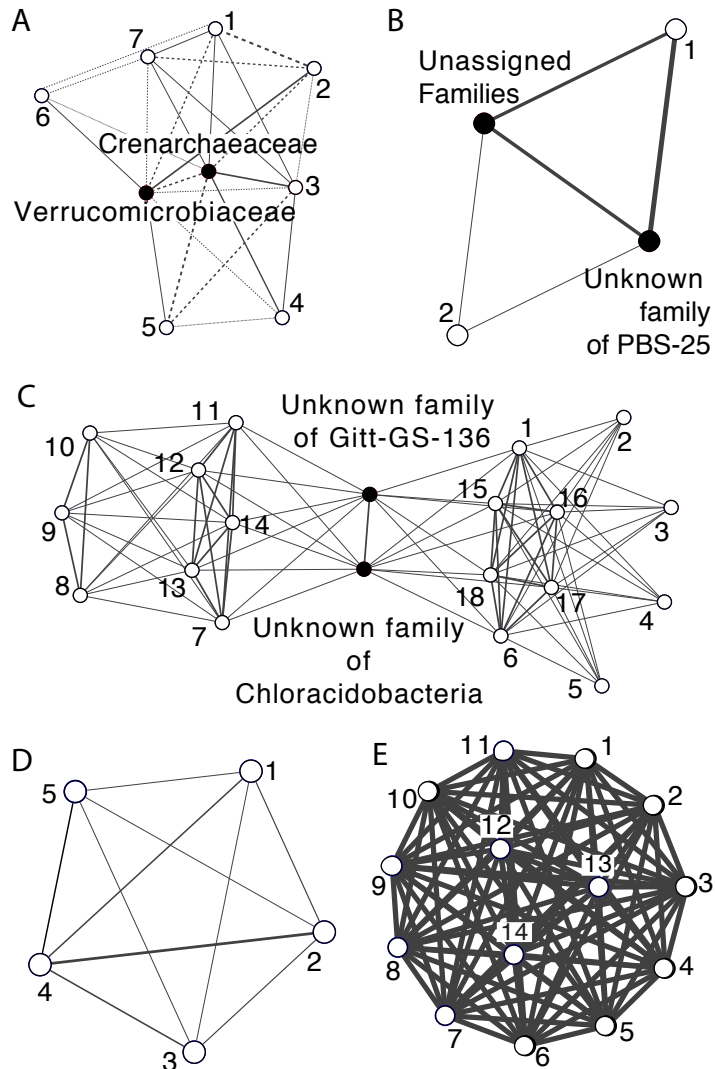

797

798 **Figure 4.** Network topology of clusters of organisms that correlated with time, CI, NPOC,  
799 temperature, ATP, and/or Raz (see Figure 3) are presented in (A) nearshore attached cluster 1,  
800 (B) nearshore planktonic cluster 9, (D) inland planktonic cluster 3, (E) inland cluster 5, and (E)  
801 river cluster 2. Edge thickness denotes the strength of Spearman's correlation between two nodes  
802 (ranging from 0.6 to 1.0), and keystone taxa are denoted as black nodes with labels. All other  
803 nodes are numbered according to Table S4, and BC values for all nodes are also listed in table  
804 S4. Solid edges represent positive correlations and dashed edges represent negative correlations.

805

806

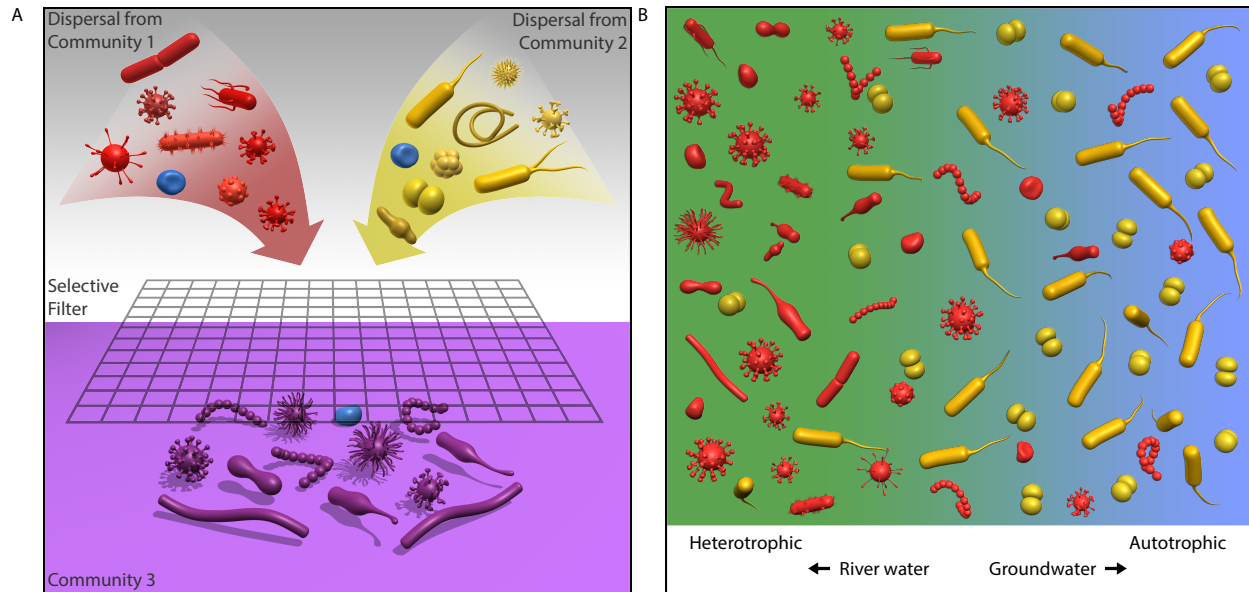

807

808 **Figure 5.** Conceptual diagrams depicting (A) influences of assembly processes on microbiomes  
809 in our system and (B) microbiome shifts associated with hydrologic change in the nearshore  
810 hyporheic zone. In (A), hydrologic processes transport microorganisms from two communities to  
811 a third location. Each community consists of largely distinct organisms denoted by color (red vs.  
812 yellow), but contains a small proportion of similar organisms represented by the blue organism  
813 common to both dispersing communities. The establishment of dispersing organisms in the third  
814 location (purple zone) is strongly impacted by selective filters that limit successful immigration  
815 of organisms across environments. The local environment therefore selects for a unique  
816 microbiome (purple organisms) with the exception of a blue organism common to all three  
817 communities. Panel (B) depicts changes in microbiomes from heterotrophic to autotrophic  
818 metabolisms as hydrologic mixing conditions shift from surface water-dominated to  
819 groundwater-dominated. Mixing conditions are displayed as the background color, with green  
820 indicating surface water and blue indicating groundwater. Heterotrophic organisms are displayed  
821 in red, and autotrophic organisms are displayed in yellow.

822

823 **Table 1.** Phyla and classes of high abundance microorganisms are listed in Table 1.

| <b>Phyla</b>              |                             |                 |                        |                 |                          |                 |                         |                 |        |
|---------------------------|-----------------------------|-----------------|------------------------|-----------------|--------------------------|-----------------|-------------------------|-----------------|--------|
| <i>Nearshore attached</i> | <i>Nearshore planktonic</i> |                 | <i>Inland attached</i> |                 | <i>Inland planktonic</i> |                 | <i>River planktonic</i> |                 |        |
| Proteobacteria            | 34.82%                      | Proteobacteria  | 29.35%                 | Proteobacteria  | 60.66%                   | Proteobacteria  | 27.66%                  | Bacteroidetes   | 28.82% |
| Bacteroidetes             | 19.12%                      | Bacteroidetes   | 17.38%                 | Bacteroidetes   | 8.13%                    | Unassigned      | 17.32%                  | Actinobacteria  | 23.35% |
| Planctomycetes            | 13.74%                      | Actinobacteria  | 14.67%                 | Planctomycetes  | 5.27%                    | OP3             | 12.91%                  | Proteobacteria  | 23.31% |
| Verrucomicrobia           | 11.91%                      | Verrucomicrobia | 8.16%                  | Acidobacteria   | 4.41%                    | Actinobacteria  | 7.45%                   | Verrucomicrobia | 10.07% |
| Acidobacteria             | 6.03%                       | Planctomycetes  | 6.68%                  | Crenarchaeota   | 4.07%                    | Bacteroidetes   | 5.98%                   | Planctomycetes  | 5.18%  |
| Crenarchaeota             | 2.68%                       | Unassigned      | 5.13%                  | Verrucomicrobia | 2.93%                    | Planctomycetes  | 4.43%                   | Cyanobacteria   | 4.66%  |
| Unassigned                | 2.50%                       | Acidobacteria   | 4.11%                  | Actinobacteria  | 2.76%                    | Crenarchaeota   | 4.00%                   | Acidobacteria   | 1.37%  |
| Actinobacteria            | 1.59%                       | OP3             | 3.15%                  | Unassigned      | 2.44%                    | Verrucomicrobia | 2.87%                   | Armatimonadetes | 7.51%  |
| Nitrospirae               | 1.56%                       | Cyanobacteria   | 2.44%                  | Nitrospirae     | 2.29%                    | Acidobacteria   | 2.58%                   | Unassigned      | 6.08%  |
| Chloroflexi               | 1.28%                       | Crenarchaeota   | 2.10%                  | Chloroflexi     | 1.72%                    | Nitrospirae     | 2.17%                   | Chloroflexi     | 5.40%  |
| Remainder                 | 4.76%                       | Remainder       | 6.83%                  | Remainder       | 5.32%                    | Remainder       | 12.65%                  | Remainder       | 1.35%  |

  

| <b>Class</b>              |                             |                     |                        |                     |                          |                     |                         |                        |        |
|---------------------------|-----------------------------|---------------------|------------------------|---------------------|--------------------------|---------------------|-------------------------|------------------------|--------|
| <i>Nearshore attached</i> | <i>Nearshore planktonic</i> |                     | <i>Inland attached</i> |                     | <i>Inland planktonic</i> |                     | <i>River planktonic</i> |                        |        |
| Gammaproteobacteria       | 12.49%                      | Actinobacteria      | 12.06%                 | Betaproteobacteria  | 30.50%                   | Unassigned          | 17.32%                  | Actinobacteria         | 21.19% |
| Planctomycetia            | 12.07%                      | Betaproteobacteria  | 10.22%                 | Gammaproteobacteria | 17.78%                   | Betaproteobacteria  | 8.68%                   | Betaproteobacteria     | 10.95% |
| Betaproteobacteria        | 9.20%                       | Alphaproteobacteria | 9.98%                  | Alphaproteobacteria | 9.40%                    | Alphaproteobacteria | 7.71%                   | Alphaproteobacteria    | 9.80%  |
| Alphaproteobacteria       | 9.11%                       | Saprosirae          | 5.81%                  | Planctomycetia      | 4.37%                    | PBS-25              | 7.34%                   | Flavobacteriia         | 9.46%  |
| Pedosphaerae              | 6.93%                       | Planctomycetia      | 5.18%                  | Thaumarchaeota      | 4.07%                    | Actinobacteria      | 6.41%                   | Saprosirae             | 9.45%  |
| Saprosirae                | 5.79%                       | Unassigned          | 5.13%                  | Chloracidobacteria  | 3.09%                    | Gammaproteobacteria | 5.53%                   | Sphingobacteriia       | 5.94%  |
| Flavobacteriia            | 5.05%                       | Flavobacteriia      | 4.73%                  | Unassigned          | 2.44%                    | koll11              | 5.52%                   | Planctomycetia         | 4.55%  |
| Cytophagia                | 4.15%                       | Gammaproteobacteria | 4.44%                  | Deltaproteobacteria | 2.35%                    | Deltaproteobacteria | 5.45%                   | Synechococccophycideae | 4.10%  |
| Chloracidobacteria        | 3.84%                       | Deltaproteobacteria | 4.42%                  | Saprosirae          | 2.29%                    | Thaumarchaeota      | 3.85%                   | Cytophagia             | 3.77%  |
| Deltaproteobacteria       | 3.81%                       | Sphingobacteriia    | 4.01%                  | Nitrospira          | 2.29%                    | Planctomycetia      | 2.59%                   | Opitutae               | 3.65%  |
| Remainder                 | 27.54%                      | Remainder           | 34.02%                 | Remainder           | 21.43%                   | Remainder           | 29.58%                  | Remainder              | 17.15% |

824  
825

826

827

828 **Table 2.** Assembly processes influencing microbiome composition are listed as percentage of  
 829 assembly mechanisms in Table 2.

|                                | Variable Selection | Homogeneous Selection | Total Selection | Dispersal Limitation | Homogenizing Dispersal | Undominated | Total Stochasticity |
|--------------------------------|--------------------|-----------------------|-----------------|----------------------|------------------------|-------------|---------------------|
| <i>Within Geographic Zone</i>  |                    |                       |                 |                      |                        |             |                     |
| Nearshore attached             | 0                  | 100                   | 100             | 0.0                  | 0.0                    | 0.0         | 0                   |
| Nearshore planktonic           | 6.8                | 52.9                  | 59.8            | 6.6                  | 14.9                   | 18.7        | 40.2                |
| Inland attached                | 0.4                | 82.1                  | 82.5            | 1.7                  | 1.7                    | 14.0        | 17.5                |
| Inland planktonic              | 14.3               | 21.5                  | 35.7            | 22.1                 | 7.2                    | 35.6        | 64.3                |
| River planktonic               | 0                  | 95.5                  | 95.5            | 0.0                  | 3.0                    | 1.5         | 4.5                 |
| <i>Across Geographic Zones</i> |                    |                       |                 |                      |                        |             |                     |
| Inland-to-nearshore planktonic | 91.96              | 0                     | 91.96           | 1.79                 | 1.79                   | 4.46        | 8.04                |
| Nearshore-to-river planktonic  | 34.84              | 29.18                 | 64.02           | 2.83                 | 15.3                   | 17.85       | 35.98               |
| Inland-to-river planktonic     | 51.17              | 6.33                  | 57.5            | 26.76                | 1.64                   | 14.1        | 42.5                |

830  
831
